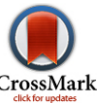

# Identification of Polyketide Inhibitors Targeting 3-Dehydroquinone Dehydratase in the Shikimate Pathway of *Enterococcus faecalis*

Vivian Wing Ngar Cheung<sup>1</sup>✉, Bo Xue<sup>2</sup>✉, Maria Hernandez-Valladares<sup>2</sup>, Maybelle Kho Go<sup>1</sup>, Alvin Tung<sup>2</sup>, Adeleke H. Aguda<sup>2</sup>, Robert C. Robinson<sup>1,2\*</sup>, Wen Shan Yew<sup>1,3\*</sup>

**1** Department of Biochemistry, Yong Loo Lin School of Medicine, National University of Singapore, Singapore, Singapore, **2** Institute of Molecular and Cell Biology, Singapore, Singapore, **3** Synthetic Biology Research Consortium, National University of Singapore, Singapore, Singapore

## Abstract

Due to the emergence of resistance toward current antibiotics, there is a pressing need to develop the next generation of antibiotics as therapeutics against infectious and opportunistic diseases of microbial origins. The shikimate pathway is exclusive to microbes, plants and fungi, and hence is an attractive and logical target for development of antimicrobial therapeutics. The Gram-positive commensal microbe, *Enterococcus faecalis*, is a major human pathogen associated with nosocomial infections and resistance to vancomycin, the “drug of last resort”. Here, we report the identification of several polyketide-based inhibitors against the *E. faecalis* shikimate pathway enzyme, 3-dehydroquinone dehydratase (DHQase). In particular, marein, a flavonoid polyketide, both inhibited DHQase and retarded the growth of *Enterococcus faecalis*. The purification, crystallization and structural resolution of recombinant DHQase from *E. faecalis* (at 2.2 Å resolution) are also reported. This study provides a route in the development of polyketide-based antimicrobial inhibitors targeting the shikimate pathway of the human pathogen *E. faecalis*.

**Citation:** Cheung VWN, Xue B, Hernandez-Valladares M, Go MK, Tung A, et al. (2014) Identification of Polyketide Inhibitors Targeting 3-Dehydroquinone Dehydratase in the Shikimate Pathway of *Enterococcus faecalis*. PLoS ONE 9(7): e103598. doi:10.1371/journal.pone.0103598

**Editor:** Ali Al-Ahmad, University Hospital of the Albert-Ludwigs-University Freiburg, Germany

**Received:** May 7, 2014; **Accepted:** July 4, 2014; **Published:** July 29, 2014

**Copyright:** © 2014 Cheung et al. This is an open-access article distributed under the terms of the Creative Commons Attribution License, which permits unrestricted use, distribution, and reproduction in any medium, provided the original author and source are credited.

**Data Availability:** The authors confirm that all data underlying the findings are fully available without restriction. All relevant data are within the paper and its Supporting Information files. The atomic coordinates and structure factors (PDB code 4PH6) have been deposited in the Protein Data Bank, Research Collaboratory for Structural Bioinformatics, Rutgers University, New Brunswick, NJ (<http://www.rcsb.org/>).

**Funding:** This research was supported by grants from the Ministry of Education, the National Medical Research Council and the National Research Foundation of Singapore to W.S.Y., and grants from the Biomedical Research Council of A\*STAR to R.C.R. The funders had no role in study design, data collection and analysis, decision to publish, or preparation of the manuscript.

**Competing Interests:** The authors have declared that no competing interests exist.

\* Email: rrobinson@imcb.a-star.edu.sg (RCR); bchyws@nus.edu.sg (WSY)

✉ These authors contributed equally to this work.

## Introduction

The shikimate pathway comprises seven catalytic steps that convert the metabolic substrates D-erythrose 4-phosphate and phosphoenolpyruvate to chorismate in all microorganisms, including common enteric bacteria such as *Escherichia coli* and pathogenic microbes such as the vancomycin-resistant *Enterococci* (VRE) [1]. Chorismate is a necessary precursor in the biosynthesis of folate, aromatic amino acids and ubiquinone. The pathway is exclusive and crucial for microorganisms, plants and fungi.

The recent emergence of multi-drug resistant pathogenic microbes demonstrates a pressing need to develop new antibiotics. The absence of the shikimate pathway in humans presents an attractive target in the development of antimicrobials. Numerous studies have attempted to target enzymes in the shikimate pathway [2]. Currently, N-phosphomethylglycine is the only commercially available compound that targets one of the enzymes in the pathway; it targets 5-enolpyruvate shikimate-3-phosphate synthase [3,4,5].

3-Dehydroquinone dehydratase (DHQase) is the third enzyme in the shikimate pathway. DHQase catalyzes the dehydration of 3-

dehydroquinone to 3-dehydroshikimate (Figure 1). There are two types of DHQase: type I enzymes catalyze a Schiff base mechanism using a catalytic lysine residue; type II DHQase catalyze the dehydration reaction *via* an enolate intermediate. DHQase from *Enterococcus faecalis* is a type I enzyme. Other organisms that have type I DHQases include *Escherichia coli* [6], *Salmonella typhi* [7] and *Shigella dysenteriae* [8].

Flavonoids are produced by plants as secondary metabolites, and include polyketide-based natural compounds. Polyketides are a large class of biomolecules that are naturally produced by bacteria, fungi and plants, and include many clinically important biomolecules with anti-cancer, anti-microbial, anti-oxidant and anti-inflammatory activities. Currently, there are about 3000 flavonoids extracted and characterized from plants [9]. The main function of these compounds is to provide colors attractive to plant pollinators [10]. Other physiological functions include defense against fungal pathogens and UV-B radiation [10]. They are also involved in energy transfer, growth regulation, respiration, photosynthesis, morphogenesis, and sex determination [10]. The basic structural feature of flavonoids is the 2-phenyl-benzo[ $\alpha$ ]pyr-

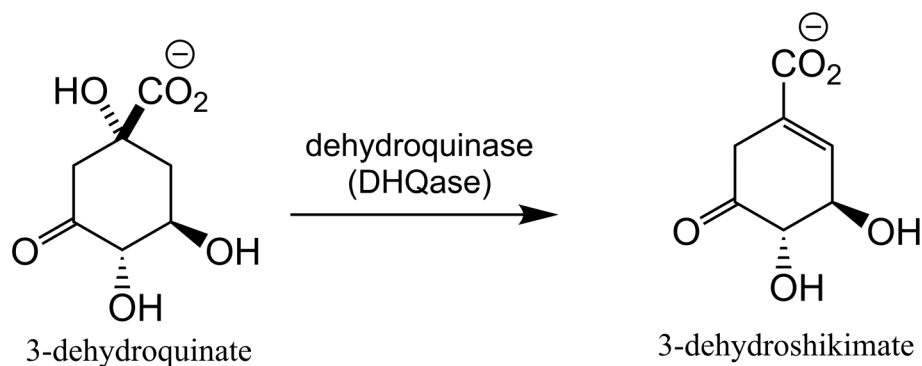

**Figure 1. The DHQase reaction.**  
doi:10.1371/journal.pone.0103598.g001

ane or flavane nucleus, which consists of two benzene rings (A and B) linked through a heterocyclic pyrane ring (C) (Figure 2).

Flavonoid compounds may be classified based on their biosynthetic origins, as follows: aurone, isoflavone, chalcone, flavanone, flavone, flavonol, flavanon-3-ol, anthocyanidin, flavan-3-ol, and flavan. Various studies showed flavonoids exhibit antimicrobial properties; examples include apigenin, galangin, pinocembrin, poncirtin, genkwanin, sophoraflavanone G and its derivatives, naringenin, epigallocatechin gallate and its derivatives, luteolin, quercetin, 3-*O*-methylquercetin, and kaempferol and its derivatives [11]. Most of these compounds have low toxicity towards mammals, making them attractive templates for drug development.

Herein, we report the identification of various flavonoids as potential inhibitors for DHQase from *E. faecalis* (efDHQase). The study also elucidated the structure of *E. faecalis* DHQase to a resolution of 2.2 Å. This study provides significant biochemical and structural information that will facilitate the future development of polyketide-based antimicrobial inhibitors targeting the shikimate pathway of the nosocomial pathogen *E. faecalis*.

## Materials and Methods

### Cloning, expression and purification of 3-dehydroquinate dehydratase from *Enterococcus faecalis* (efDHQase)

The *aroD* gene encoding 3-dehydroquinate dehydratase (efDHQase, 3-dehydroquinate dehydratase from *Enterococcus faecalis* V583 strain) (GI: 29376281) was amplified *via* PCR from genomic DNA isolated from *E. faecalis* V583 strain using Platinum *Pfx* DNA polymerase (Invitrogen). The PCR mixture (100 µL) contained 1 ng of plasmid DNA, 10 µL of 10× *Pfx*

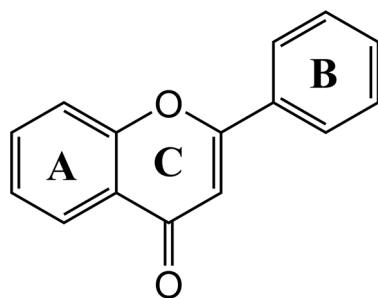

**Figure 2. Backbone structure of flavones.** Two benzene rings (A and B) linked through a heterocyclic pyrane ring (C).  
doi:10.1371/journal.pone.0103598.g002

amplification buffer, 1 mM MgSO<sub>4</sub>, dNTPs (0.4 mM each), 40 pmol of each primer (forward primer 5'-GAGGAGGCGC-CATATGAGCAACCATCTTTTCGACG-3' and reverse primer 5'-GAGAGCGCGGGATCCTTACGTCTGGTATAAA-GATC-3'), and 5 units of Platinum *Pfx* DNA polymerase. The gene was amplified using a PTC-0200G Thermal Cycler (Bio-Rad Laboratories), with the following parameters: 94°C for 2 min followed by 40 cycles of 94°C for 1 min, 55°C for 1 min and 15 s, and 68°C for 3 min, and a final extension of 68°C for 10 min. The amplified gene was cloned into a modified pET-15b vector (Novagen) in which the N-terminus contained 10 His residues (kindly provided by Professor John Gerlt, University of Illinois, Urbana, IL) [12]. The protein was expressed in *E. coli aroD*<sup>-</sup> *pTara*, an auxotroph *aroD*<sup>-</sup> negative *E. coli* mutant strain in which the *aroD* gene was deleted from the genome. Transformed cells were grown at 37°C in LB broth (supplemented with 100 µg/mL of ampicillin, 15 µg/mL of chloramphenicol and 50 µg/mL of kanamycin) to an OD<sub>600</sub> of 0.6, and IPTG (0.1 mM) was added to induce protein expression for 16 h. The cells were harvested by centrifugation and resuspended in binding buffer [5 mM imidazole, 0.5 M NaCl, and 20 mM Tris-HCl (pH 7.9)] and lysed by sonication. The lysate was clarified by centrifugation, and the His-tagged protein was purified using a column of chelating Sepharose Fast Flow (GE Healthcare Bio-Sciences Corp.) charged with Ni<sup>2+</sup> ion. The cell lysate was applied to the column in binding buffer, washed with buffer containing 154 mM imidazole, 0.5 M NaCl, and 20 mM Tris-HCl, pH 7.9, and eluted with 100 mM L-histidine, 0.5 M NaCl, and 20 mM Tris-HCl, pH 7.9. The N-terminal His tag was removed with thrombin (GE Healthcare Bio-Sciences Corp.) according to the manufacturer's instructions, and the proteins were purified to homogeneity on a Q-Sepharose High Performance column (GE Healthcare Bio-Sciences Corp.) equilibrated with binding buffer [25 mM Tris-HCl, pH 7.9] and eluted with a linear gradient from 0 to 0.5 M elution buffer [1 M NaCl and 25 mM Tris-HCl, pH 7.9].

### Cloning, expression and purification of shikimate dehydrogenase from *Enterococcus faecalis* (efSHD)

The *aroE* gene encoding shikimate dehydrogenase (efSHD) (GI: 29343586) was amplified *via* PCR from genomic DNA isolated from *E. faecalis* V583 strain using Platinum *Pfx* DNA polymerase (Invitrogen). The PCR mixture (100 µL) contained 1 ng of plasmid DNA, 10 µL of 10× *Pfx* amplification buffer, 1 mM MgSO<sub>4</sub>, dNTPs (0.4 mM each), 40 pmol of each primer (forward primer 5'-AAGGAGCACACCATATGAAAGAAATAACTG-GAGCCACTCG-3' and reverse primer 5'-TAAACGGCGG-

**Table 1.** Data Collection, Refinement and Structure Validation Statistics.

| Data collection                          |                         |
|------------------------------------------|-------------------------|
| Space group                              | P1                      |
| Cell dimensions                          |                         |
| a, b, c (Å)                              | 42.97, 48.29, 67.43     |
| alpha, beta, gamma (°)                   | 108.07, 92.86, 111.83   |
| Resolution (Å)                           | 19.8 – 2.2 (2.3 – 2.2)  |
| Rmerge (%)                               | 5.9 (20.7)              |
| I/sigma(I)                               | 9.2 (3.7)               |
| Completeness (%)                         | 89.2 (49.0)             |
| Redundancy                               | 3.4 (1.4)               |
| Refinement                               |                         |
| Resolution (Å)                           | 19.8 – 2.2 (2.3– 2.2)   |
| No. reflections                          | 21267 (1063)            |
| R <sub>work</sub> /R <sub>free</sub> (%) | 18.5 (25.5)/18.2 (24.2) |
| No. atoms                                |                         |
| Protein                                  | 3746                    |
| Water                                    | 311                     |
| B-factors                                |                         |
| Protein                                  | 15.6                    |
| Water                                    | 22.3                    |
| R.m.s. deviations                        |                         |
| Bond lengths (Å)                         | 0.008                   |
| Bond angles (°)                          | 1.042                   |
| MOLPROBITY validation                    |                         |
| Poor rotamers                            | 0.97% (Goal: <1%)       |
| Ramachandran outliers                    | 0% (Goal: <0.2%)        |
| Ramachandran favored                     | 98.9% (Goal: >98%)      |
| Cβ deviations >0.25 Å                    | 0 (Goal: 0)             |
| Residues with bad bonds:                 | 0% (Goal: 0%)           |
| Residues with bad angles:                | 0% (Goal: <0.1%)        |

doi:10.1371/journal.pone.0103598.t001

GATCCTTATCTATTTTCAATTTTACGTTTTACG-3'), and 5 units of Platinum *Pfx* DNA polymerase. The gene was amplified using a PTC-0200G Thermal Cycler (Bio-Rad Laboratories), with the following parameters: 94°C for 2 min followed by 40 cycles of 94°C for 1 min, 55°C for 1 min and 15 s, and 68°C for 3 min, and a final extension of 68°C for 10 min. The amplified gene was

cloned into the modified pET-15b vector (Novagen) [12]. The protein was expressed in *E. coli aroE<sup>-</sup> pTara*, an auxotroph *aroE<sup>-</sup>* negative *E. coli* mutant strain in which the *aroE* gene was deleted from the genome. Transformed cells were grown at 37°C in LB broth (supplemented with 100 µg/mL of ampicillin, 15 µg/mL of chloramphenicol and 50 µg/mL of kanamycin) to an

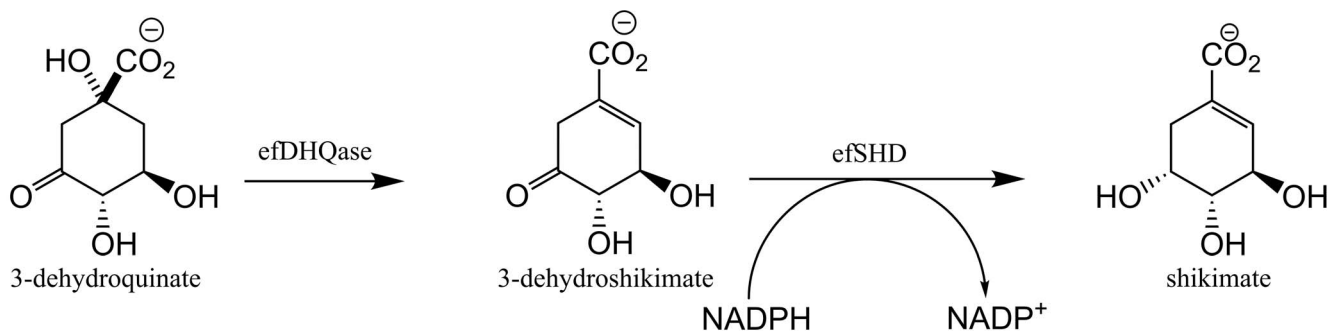**Figure 3.** efDHQase-efSHD coupled-enzyme assay.

doi:10.1371/journal.pone.0103598.g003

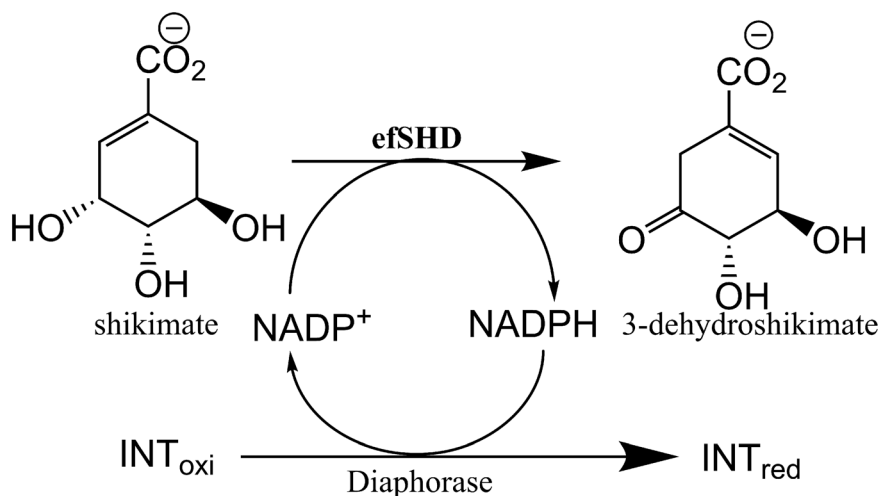

**Figure 4. efSHD-diaphorase coupled-enzyme assay.**  
doi:10.1371/journal.pone.0103598.g004

OD<sub>600</sub> of 0.6, and IPTG (0.1 mM) was added to induce protein expression for 16 h. efSHD was purified from the harvested cells as previously described for efDHQase.

#### Crystallization and structure solution of efDHQase

Freshly prepared efDHQase was concentrated to 30 mg/mL. Crystals grew within 5 days at 25°C by the sitting-drop vapor diffusion method from a 1:1 (v/v) mixture with precipitant solution comprised of 100 mM HEPES sodium salt, pH 7.5, 30% (w/v) PEG 4000, and 0.2 M calcium chloride. Crystals were soaked in the precipitant solution supplemented with 20% (v/v) glycerol, and flash frozen in liquid nitrogen. X-ray diffraction data were collected at 100 K on a Bruker X8 PROTEUM system consisting of a MICROSTAR micro-focus X-ray generator, a PLATINUM135 CCD detector, and a 4-circle KAPPA goniometer. Data reduction was carried out using SAINT, SADABS, and XPREP, within the Bruker Proteum2 program suite [13,14].

Structural determination of efDHQase was initiated by molecular replacement using the structure of dehydroquininate dehydratase from *Clostridium difficile* (PDB ID: 3JS3, chain A) as the model. The model, together with the processed data and the amino acid sequence of efDHQase, was fed into MrBUMP [15], an automated molecular replacement pipeline in the CCP4 suite [16]. CHAINSAW [17], PHASER [18] and REFMAC5 [19] were used within this pipeline to automatically trim the model, search for its correct rotation and translation, and refine it, respectively. The solution was then subjected to five rounds of automated model building using ARP/wARP [20], followed by restrained refinement in PHENIX [21] and manual building in COOT [22]. TLS refinement was included in the later rounds of PHENIX refinement. All the structure-related figures were prepared with the PyMOL Molecular Graphics System (DeLano Scientific LLC). Data collection and refinement statistics are listed in Table 1. Attempts at obtaining inhibitor-liganded structures of efDHQase were unsuccessful.

#### Kinetic parameters of efDHQase

The activity of efDHQase was measured using a continuous coupled-enzyme spectrophotometric assay monitored at 25°C. The rate of dehydroshikimate formation was coupled to the oxidation of NADPH (340 nm,  $\epsilon = 6220 \text{ M}^{-1} \text{ cm}^{-1}$ ) (Figure 3). The 200  $\mu\text{L}$  assay contained 50 mM HEPES buffer, pH 7.5,

0.25 mM NADPH, 0.25 mM 3-dehydroquininate, 10 nM DEF and 10 nM shikimate dehydrogenase (efSHD). The kinetic parameters were determined by fitting the initial rates to the Michaelis-Menten equation.

#### Screening for inhibitors targeting DEF

A library of 139 commercially available compounds containing different families of flavonoids was used for the screening. They were purchased from Sigma-Aldrich Co. (St. Louis, MO), Tokyo Chemical Industry (TCI) Co., Extrasynthese Co., and Lier Chemical Co. (Sichuan, China). The compounds are acacetin, aesculine, apigenin, apigenin-7-glucoside, apigeninidin chloride, apiin, biochanin, butein, butin, D-catechin tetrahydrate, (-)-catechin, (+)-catechin, ( $\pm$ )-catechin, chalcone, chrysin, cinnamic acid, coumarin, cyanidanol-3, cyaniding chloride, cyanin chloride, daidzein, daidzin, daphnetin, datiscetin, delphinidin chloride, dihydrofisetin, dihydroquercetin, dihydrorobinetin, 2,6-dihydroxyacetophenone, 2,3-dihydroxybenzoic acid, 2,4-dihydroxybenzoic acid, 3,4-dihydroxyhydrocinnamic acid, 4',7-dihydroxyflavanol, 5,7-dihydroxy-4'-methoxyflavone, 5,7-dihydroxy-3',4',5'-trimethoxyflavone, 2,4-dimethoxycinnamic acid, 3,4-dimethoxycinnamic acid, 3',4'-dihydroxyflavone, 2',6'-dihydro-4'-methoxydihydrochalcone, diosmetin, diosmin, (-)-epicatechin, (-)-epicatechin gallate, (-)-epicatechol, ( $\pm$ )-epicatechol, (-)-epigallocatechin, epigallocatechin gallate, eriodictyol, eriodictyol-7-glucoside, ferulic acid, ferulic acid, fisetin, (-)-fisetinidin, fisetinidin chloride, flavanone, flavanone hydrazone, flavanone-azine, flavene, flavone, flavonol, flavonone, formononetin, fustin, galangin, gallic acid, genistein, genistin, gossypin, hamamelitannin, hesperetin, hesperidin, homoorientin, 2-hydroxychalcone, 4-hydroxychalcone, 4-hydroxycinnamic acid, 3-hydroxycoumarin, 4-hydroxycoumarin, 4'-hydroxyflavanone, 3-hydroxyflavone, 5-hydroxyflavone, 6-hydroxyflavone, 7-hydroxyflavone, 5-hydroxyflavonone, *p*-hydroxyphenylacetic acid, isoquercitrin, isorhamnetin, kaempferol, kinetin, leucocyanidin hydrate, linarin, luteolin, luteolin-3',7'-Diglucoside, luteolin-4'-glucoside, luteolin-7-glucoside, luteolinidin chloride, marein, maritimoin, 2-methoxycinnamic acid, 4-methoxycinnamic acid, methylchalcone,  $\alpha$ -methylcinnamic acid, 4-methylcinnamic acid,  $\beta$ -methylumbelliferone, mono-7-rutin, morin, myricetin, myricitrin, naringenin, naringin, orientin, phenylacetic acid, 2-phenylchromone, phloretin, phloridzin, phloridzin dihydrate, puerarin, quebrachitol, quercetin,

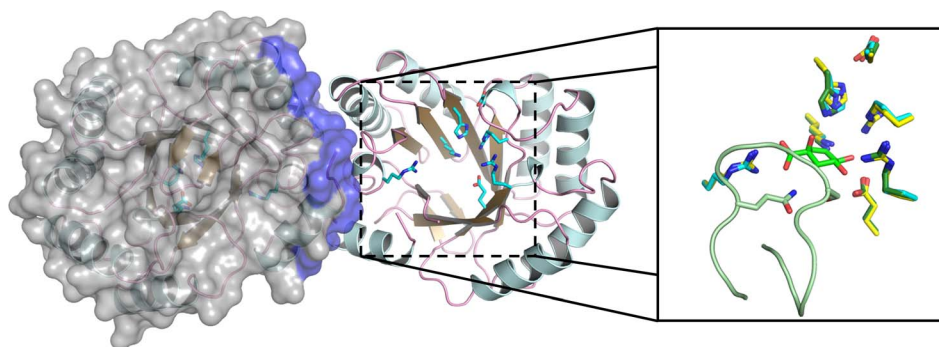

**Figure 5. Crystal structure of eFDHQase.** The biological assembly of eFDHQase is a homodimer. Alpha-helices,  $\beta$ -strands, and loops are shown as cartoon representations and colored light blue, golden, and pink, respectively, to visualize the  $(\beta/\alpha)_8$ -barrel scaffold on each monomer. Residues at the dimer interface are highlighted purple on the surface (grey) of one monomer. Residues involved in ligand binding are shown as sticks and colored cyan. Comparison of eFDHQase's active center with homologous 3-dehydroquinate dehydratases from *Salmonella enterica* (seDHQase) and *Clostridium difficile* (cdDHQase) is shown in the magnified view on the right. The structures were superimposed onto each other using the C $\alpha$  atoms of the ligand-binding residues, with the residues from seDHQase and cdDHQase colored dark green and yellow, respectively. The pre-dehydration intermediate covalently-attached to seDHQase is drawn as green sticks. Part of the  $\beta$ - $\alpha$  loop from seDHQase is shown as light green cartoon representations.

doi:10.1371/journal.pone.0103598.g005

quercitrin, quercitrine, rhamnetin, rhoifolin, robinetin, robinin, rutin, rutinose, sakuranetin, scopoletin, (–)-shikimic acid, silybin, sinapic acid, sulfuretin, tangeretin, (+)-taxifolin, techtochrysin, 3,5,7-trihydroxyflavone, 4',6,7-trihydroxyisoflavone, umbelliferone, and veratric acid, respectively.

The eFDHQase coupled-enzyme assay was used to identify potential inhibitors from the library. Flavonoids that decreased the rate of dehydroshikimate formation by at least 50% were considered as potential eFDHQase or eFSDH inhibitors.

Flavonoids that inhibited the eFDHQase coupled-enzyme assay may inhibit eFSDH instead of eFDHQase. Thus, eFSDH was assayed independently. eFSDH was assayed using a continuous coupled-enzyme spectrophotometric assay (Figure 4) monitored at 25°C. The rate of 3-dehydroshikimate formation was coupled to the reduction of *p*-iodonitrotetrazolium (INT) (500 nm,  $\epsilon = 17800 \text{ M}^{-1} \text{ cm}^{-1}$ ). The 200  $\mu\text{L}$  assay contained 50 mM HEPES buffer, pH 7.5, 0.15 mM NADP<sup>+</sup>, 1.5 mM shikimate, 5 units of diaphorase (Sigma), 1 mM INT, and 10 nM eFSDH. Flavonoids that did not affect the rate of dehydroshikimate formation were considered as potential eFDHQase inhibitors.

#### Determination of minimal inhibition concentration against *E. faecalis*

A minimal inhibition concentration (MIC) assay using the flavonoid library was performed to screen for compounds targeting the growth of *E. faecalis*. The assay was based on the standard guidelines from the National Committee for Clinical Laboratory Standards (NCCLS), sixth edition. Briefly, turbidity-adjusted bacterial suspensions from fresh overnight cultures were added

to LB broth to conform to an inoculation density of  $5 \times 10^5$  cfu/mL. Each 100  $\mu\text{L}$  bacterial culture contained 2 mM flavonoid and was incubated for 17 h at 37°C. After incubation, the cell density at OD<sub>600</sub> was measured for each culture. If the cell density of the flavonoid containing culture is less than 50% compared to the cultures that did not have any flavonoid, these flavonoids were chosen as potential inhibitors.

Flavonoids used at 2 mM that inhibited *E. faecalis* growth by at least 50% were further tested. The concentration of each flavonoid was continually decreased until the lowest concentration of the compound that inhibited *E. faecalis* growth by at least 50% was obtained. This concentration is calculated to be the MIC for each flavonoid.

## Results and Discussion

### Crystal structure of eFDHQase

The crystal structure of eFDHQase was solved using the Protein Crystallography X-Ray Facility hosted by the Institute of Molecular and Cell Biology, A\*STAR Singapore. The eFDHQase monomer has a  $(\beta/\alpha)_8$ -barrel scaffold (Figure 5). The majority of the molecule is well ordered and with clear density in the electron density map, with the exceptions of the first and last two residues at the N- and C-terminus, respectively, and a disordered portion (Ala228-Gln236) within the loop connecting the 8th  $\beta$ -strand and the 8th  $\alpha$ -helix ( $\beta$ - $\alpha$  loop). There are two monomers in the asymmetric unit of the crystal, forming a homodimer. Using the Protein Interfaces, Surfaces and Assemblies (PISA) service at the European Bioinformatics Institute (<https://www.ebi.ac.uk/>)

**Table 2.** Kinetic parameters of various DHQases.

| Organism                             | $k_{\text{cat}}$ ( $\text{s}^{-1}$ ) | $K_{\text{M}}$ ( $\mu\text{M}$ ) | $k_{\text{cat}}/K_{\text{M}}$ ( $\text{M}^{-1} \text{ s}^{-1}$ ) |
|--------------------------------------|--------------------------------------|----------------------------------|------------------------------------------------------------------|
| <i>Enterococcus faecalis</i>         | 110                                  | 65                               | $1.7 \times 10^6$                                                |
| <i>Escherichia coli</i> [13]         | 135                                  | 18                               | $7.5 \times 10^6$                                                |
| <i>Salmonella typhi</i> [7]          | 200                                  | 18                               | $1.1 \times 10^7$                                                |
| <i>Streptococcus pneumoniae</i> [14] | 32                                   | 74                               | $4.3 \times 10^5$                                                |

doi:10.1371/journal.pone.0103598.t002

**Table 3.** efDHQase inhibition constants ( $K_i$ ).

| Compound                  | Type of flavonoid    | $K_i$ ( $\mu\text{M}$ ) | Mode of inhibition |
|---------------------------|----------------------|-------------------------|--------------------|
| Aesculine                 | Coumarin glycoside   | $180 \pm 38$            | Mixed              |
| Gossypin                  | Flavonoid glycoside  | $79 \pm 14$             | Mixed              |
| Homoorientin              | Flavonoid glycoside  | $140 \pm 11$            | Uncompetitive      |
| 7-Hydroxycoumarin         | Coumarin             | $42 \pm 19$             | Uncompetitive      |
| Luteolin -7-glucoside     | Flavonoid glycoside  | $69 \pm 16$             | Mixed              |
| Luteolin-3'-7-diglucoside | Flavonoid glycoside  | $89 \pm 3$              | Mixed              |
| Marein                    | Chalconoid glycoside | $340 \pm 79$            | Mixed              |
| Rhoifolin                 | Flavonoid glycoside  | $19 \pm 9$              | Uncompetitive      |
| Rutin                     | Flavonoid glycoside  | $210 \pm 28$            | Uncompetitive      |

doi:10.1371/journal.pone.0103598.t003

msd-srv/prot\_int/cgi-bin/piserver) [23], the interface area between the two monomers (colored purple in Figure 5) was calculated to be  $990.5 \text{ \AA}^2$ , or about 9% of one monomer's solvent-accessible surface area. On each monomer, there are a total of 94 atoms belonging to 24 residues that are involved in the formation of the dimer interface. The non-crystallographic symmetry (NCS) differences for most of the residues are well below  $0.3 \text{ \AA}$  (as reported by COOT [22]), indicating close conformational similarity between the two protomers.

To gain further insight into efDHQase's enzymatic activity, we compared the efDHQase structure with homologous DHQase structures from *Salmonella enterica* (seDHQase) and *Clostridium difficile* (cdDHQase). These homologous enzymes share about 46% sequence identity with efDHQase, and have been characterized structurally for their ligand binding and Schiff base formation. The magnified view in Figure 5 shows the overlaid active centers of efDHQase and its homologs, seDHQase (PDB ID: 3M7W) and cdDHQase (PDB ID: 3JS3), that have been crystallized in the presence of covalently-bound pre- and post-dehydration intermediates, respectively [24]. Key residues, which are responsible for ligand coordination in the homologous

structures, are well conserved in efDHQase (sticks representation). Moreover, these residues, and in particular Lys170, are positioned in nearly identical positions in these three homologous structures, despite the absence of bound ligand in the efDHQase structure. Such similarities strongly suggest that efDHQase catalyzes the dehydration reaction *via* a Schiff base mechanism whereby the terminal amine of efDHQase's Lys170 reversibly reacts with the carbonyl of the substrate [24,25,26,27]. To reinforce this notion, the pre-dehydration covalent intermediate bound to seDHQase is also shown in Figure 5 (green sticks), with its carbonyl carbon in close proximity to efDHQase's Lys170. Among the key ligand-binding residues of the three overlaid structures, the side chain of His143 exhibits the largest conformational deviations, which is in line with the hypothesis that this residue utilizes its conformational flexibility to exert dual catalytic roles [24]. In the absence of bound ligand, the  $\beta 8$ - $\alpha 8$  loop of efDHQase adopts the "open" conformation commonly seen in other DHQases [26,27], and becomes partially disordered. To model the "closed" conformation of the  $\beta 8$ - $\alpha 8$  loop, the undefined portion of the loop was taken from seDHQase and is shown in Figure 5 (light green). Since the residues in this portion are highly

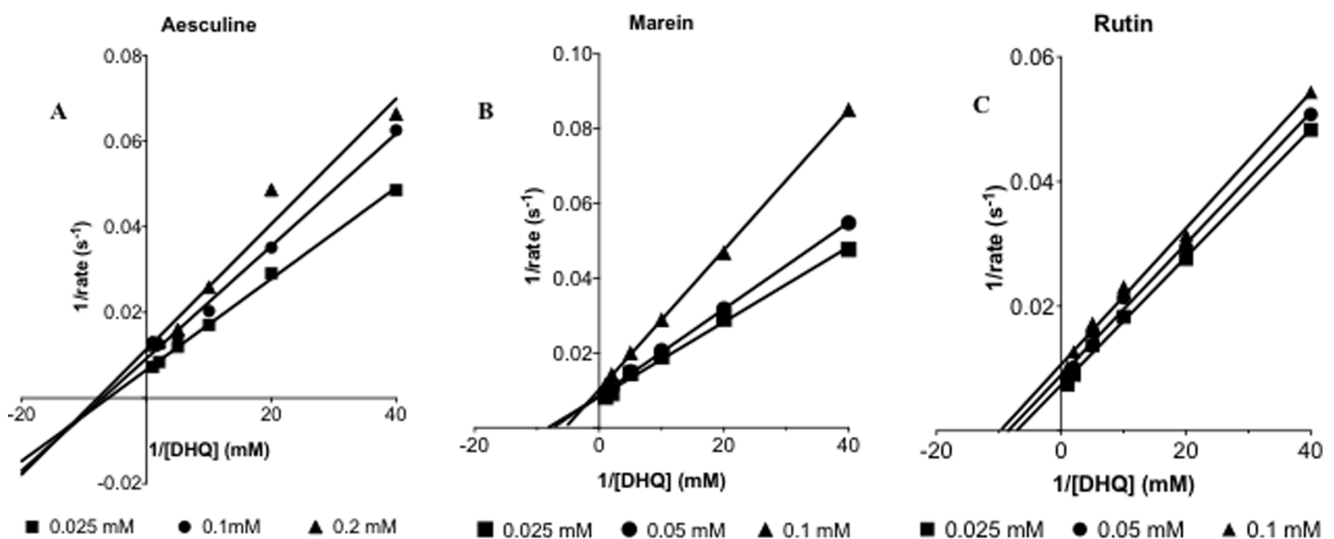

**Figure 6. Double-reciprocal plots for three of the identified inhibitors targeting efDHQase.** Plot for aesculine (A) and marein (B) showing two possible scenarios for mixed inhibition where the lines intersect either below the x-axis or just after y-axis respectively. Plot for rutin (C) showing uncompetitive inhibition where the lines run parallel to one another. doi:10.1371/journal.pone.0103598.g006

**Table 4.** List of flavonoids inhibiting *Enterococcus faecalis*.

| Compound    | Type of flavonoid  | MIC values ( $\mu\text{g/mL}$ ) |
|-------------|--------------------|---------------------------------|
| Datisctetin | Flavone            | 256                             |
| Marein      | Chalcone glycoside | 256                             |
| Naringenin  | Flavanone          | 512                             |
| Phloretin   | Chalcone           | 512                             |

doi:10.1371/journal.pone.0103598.t004

conserved among DHQases [27], the model is likely to have good credibility.

### Kinetic parameters of eFDHQase

The turnover number ( $k_{\text{cat}}$ ) of eFDHQase is  $110 \text{ s}^{-1}$  and the Michaelis constant ( $K_M$ ) for 3-dehydroquinate is  $65 \mu\text{M}$ . This is comparable to DHQases from other type I DHQases such as *Escherichia coli* [28], *Salmonella typhi* [7], and *Streptococcus pneumoniae* [29] characterized under similar conditions (Table 2).

### Flavonoid inhibitors that inhibit eFDHQase and/or *E. faecalis* growth

From a library of 139 commercially available flavonoid compounds, nine eFDHQase inhibitors were found (Table 3). The flavonoid inhibitors exhibited either mixed or uncompetitive inhibition. Representative double-reciprocal plots to determine the type of inhibition are shown in Figure 6. The  $K_I$ 's that were determined ranged from 20–350  $\mu\text{M}$ , which is in the range of 3-dehydroquinate's Michaelis constant ( $65 \mu\text{M}$ ).

Compounds that showed mixed inhibition are usually a mixture of competitive and non-competitive inhibition (Figure 6A and 6B, respectively). We propose that these compounds bind to either the enzyme or enzyme-substrate complex but with higher affinity for the former [30]. Some flavonoids showed uncompetitive inhibition (Figure 6C). We propose that these inhibitors only bind to the enzyme-substrate complex and delay the time for the substrate and product to leave the active site, thus causing a decrease in  $V_{\text{max}}$  [30].

Four compounds were identified as potential inhibitors with moderate MIC values, ranging from 500–1000  $\mu\text{M}$  (Table 4).

The 139-compound library may be classified into flavonoids and its derivatives (anthocyanidin, chalcone, flavan, flavone,

flavanone, isoflavone), aromatic acids (benzoic acids and cinnamic acids), and coumarins. Some of the flavonoids and coumarins are glycosides, with one or two sugar units. The compounds were chosen based on previous antimicrobial studies [11,31,32]

From this library, six flavonoid glycosides inhibited eFDHQase while two flavonoids inhibited the growth of *E. faecalis*. The six flavonoid glycosides can be classified further based on their aglycone – a) gossypin and rutin are quercetin glycosides; b) homoorientin, luteolin-3',7-diglucoside, and luteolin-7-glucoside are luteolin glycosides; and, c) rhoifolin is an apigenin glycoside. None of the six flavonoid glycosides inhibited the growth of *E. faecalis*. Two flavonoids, datisctetin and naringenin, inhibited the growth of *E. faecalis*. Datisctetin, a flavonol from *Datisca cannabina* (hemp), was previously found to inhibit the growth of methicillin-resistant *S. aureus* (MRSA) (MIC =  $512 \mu\text{g/mL}$ ) [33]. Naringenin, in combination with other flavonoids extracted from *Centaurea alexanderina*, was found to inhibit the growth of *P. aeruginosa* [34].

These observations are consistent with previous studies that found flavonoids inhibited bacterial growth but not their corresponding glycosides. Rauha found that quercetin inhibited the growth of Gram-positive bacteria such as *Bacillus subtilis*, *Micrococcus luteus*, *Staphylococcus aureus* and *S. epidermidis*, but not quercetin glycosides such as rutin [35]. Funayama also showed that flavonoids without the sugar moiety have antimicrobial activity on *B. subtilis*, *S. aureus*, and *M. luteus*, but their corresponding glycosides did not [32]. Pereira found that a combination of flavonoid glycosides is needed to inhibit bacterial growth; extracts containing luteolin-7-glucoside, rutin, apigenin-7-glucoside and luteolin-4'-glucoside from *Olea europaea L.* (olive tree) were found to inhibit a range of Gram-positive bacteria such as *B. cereus*, *B. subtilis*, and *S. aureus* [36].

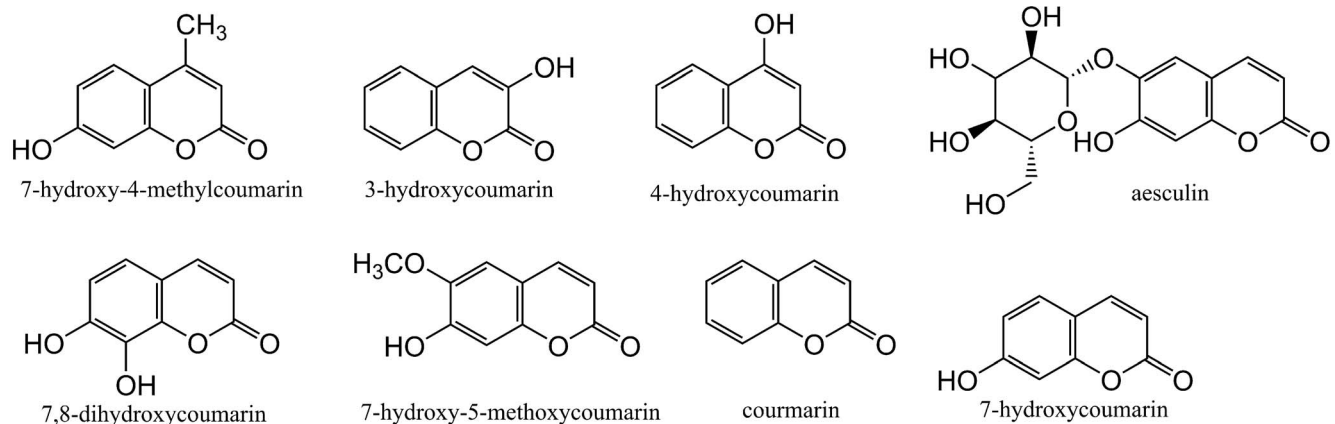**Figure 7.** Coumarins in the 139-compound polyketide-based library.

doi:10.1371/journal.pone.0103598.g007

Coumarins are a large class of phenolic substances made of fused benzene and  $\alpha$ -pyrone rings, which constitute the core skeleton of many flavonoid compounds. The library contained eight coumarins (Figure 7) but only 7-hydroxycoumarin and aesculin showed significant inhibition against efDHQase. It is possible that small perturbations to the coumarin structure greatly affected the binding to efDHQase. Both compounds did not inhibit the growth of *E. faecalis*. 7-Hydroxycoumarin was previously found to have antimicrobial properties against *Paecilomyces fulva*, a plant pathogen that causes Byssochlamys rot on strawberries [37]. Aesculin was previously shown not to have antimicrobial activity against *S. aureus*, *E. coli*, and *P. aeruginosa* [38].

A review by Venugopala postulated that long chain hydrocarbon substitutions on coumarins are needed for antibacterial activity [39]. Compounds such as ammorensin and ostruthin showed activity against Gram-positive bacteria such as *B. megaterium*, *M. luteus*, *M. lysodeikticus*, and *S. aureus* [40]. Anthogenol, from green fruits of *Aegle marmelos*, showed activity against *Enterococcus* [39]. Chartreusin and its derivatives were found to be active against methicillin-resistant *S. aureus* (MRSA), vancomycin-resistant *Enterococcus* (VRE), and *Mycobacterium vaccae* but these compounds are highly toxic [41].

Chalcones are open-chain flavonoids with  $\alpha,\beta$ -unsaturated carbonyl groups and is one of the important compound groups of flavonoids derived from nature. Out of the eight chalcones in the library, two of them, phloretin and marein, inhibited the growth of *E. faecalis* (MIC  $\leq$  512  $\mu$ g/mL). Phloretin, a chalcone found in leaves of *Malus domestica* (apple), is known to have antitumor and antioxidant properties. A study by Osório found that it inhibited fourteen strains of MRSA (MIC = 250  $\mu$ g/mL) [42].

Marein is the only compound that inhibited both efDHQase activity and *E. faecalis* growth. It is a chalcone glucoside found on *Coreopsis maritima*, functioning as one of the **anthochlor** pigments of this flower. It was recently found that it inhibited histone deacetylase enzymes and NF- $\kappa$ B, a protein complex that controls the transcription of DNA, in the 100  $\mu$ M range [43]. It was also observed to have antihyperglycemic activity [44].

## References

- Herrmann KM, Weaver LM (1999) The Shikimate Pathway. *Annu Rev Plant Physiol Plant Mol Biol* 50: 473–503.
- Coggins JR, Abell C, Evans LB, Frederickson M, Robinson DA, et al. (2003) Experiences with the shikimate-pathway enzymes as targets for rational drug design. *Biochem Soc Trans* 31: 548–552.
- Hollander H, Amrhein N (1980) The Site of the Inhibition of the Shikimate Pathway by Glyphosate: I. Inhibition by glyphosate of phenylpropanoid synthesis in buckwheat (*Fagopyrum esculentum Moench*). *Plant Physiol* 66: 823–829.
- Jaworski EG (1972) Mode of action of N-phosphonomethylglycine. Inhibition of aromatic amino acid biosynthesis. *Journal of Agricultural and Food Chemistry* 20: 1195–1198.
- Steinrücken HC, Amrhein N (1980) The herbicide glyphosate is a potent inhibitor of 5-enolpyruvyl-shikimate acid-3-phosphate synthase. *Biochem Biophys Res Commun* 94: 1207–1212.
- Chaudhuri S, Lambert JM, McColl LA, Coggins JR (1986) Purification and characterization of 3-dehydroquinase from *Escherichia coli*. *Biochem J* 239: 699–704.
- Moore JD, Hawkins AR, Charles IG, Deka R, Coggins JR, et al. (1993) Characterization of the type I dehydroquinase from *Salmonella typhi*. *Biochem J* 295 (Pt 1): 277–285.
- Walker JC, Verma NK (1997) Cloning and characterisation of the aroA and aroD genes of *Shigella dysenteriae* type 1. *Microbiol Immunol* 41: 809–813.
- Agrawal AD (2011) Pharmacological activities of flavonoids: a review. *Int J Pharm Sci Nanotechnol* 4: 1394–1398, 1395 pp.
- Tomas-Barberan FA (2001) The Handbook of Natural Flavonoids, 2 volume set, Edited by J. B. Harborne and H. Baxter. *Phytochem Anal* 12: 214.
- Cushnie TP, Lamb AJ (2005) Antimicrobial activity of flavonoids. *Int J Antimicrob Agents* 26: 343–356.

Various studies have shown that although chalcones weakly inhibits bacterial growth, adding conventional antibiotics greatly increases their antimicrobial activity [45]. A study by Tran observed better antibacterial activity when a combination of chalcones and antibiotics such as ciprofloxacin and doxycycline were used [46].

## Summary

This study has demonstrated the utilization of flavonoids as potential drug leads. We have observed inhibition against efDHQase activity and *E. faecalis* growth using flavonoids and its glycosides, chalcones, and coumarins. From a 139-compound polyketide-based library, we found that flavonoids inhibited growth while its glycosides inhibited crucial metabolic enzymes such as efDHQase. In addition, we observed that small perturbations in the coumarin structure greatly affected the ability of the polyketide-based small molecule compounds to bind to the enzyme. Lastly, chalcones inhibited bacterial growth but a synergy with more conventional antibiotics may be needed for exerting potent inhibition. We have also elucidated the structure of efDHQase. Our work provides a route in the development of polyketide-based antimicrobial inhibitors targeting the shikimate pathway of the human pathogen *E. faecalis*.

## Acknowledgments

The atomic coordinates and structure factors (PDB code 4PH6) have been deposited in the Protein Data Bank, Research Collaboratory for Structural Bioinformatics, Rutgers University, New Brunswick, NJ (<http://www.rcsb.org/>).

## Author Contributions

Conceived and designed the experiments: WSY RCR. Performed the experiments: VWNC BX MH MKG AT AHA. Analyzed the data: VWNC BX MH MKG. Contributed reagents/materials/analysis tools: VWNC BX MH MKG. Contributed to the writing of the manuscript: VWNC BX MH MKG RCR WSY.

- Yew WS, Gerlt JA (2002) Utilization of L-ascorbate by *Escherichia coli* K-12: assignments of functions to products of the yjF-sga and yia-sgb operons. *J Bacteriol* 184: 302–306.
- Bruker AXS (2010) PROTEUM2. Bruker AXS Inc., Madison, Wisconsin, USA.
- Sheldrick GM (2008) A short history of SHELX. *Acta Crystallographica Section A, Foundations of crystallography* 64: 112–122.
- Keegan RM, Winn MD (2007) Automated search-model discovery and preparation for structure solution by molecular replacement. *Acta Crystallographica Section D Biological Crystallography* 63: 447–457.
- Winn MD, Ballard CC, Cowtan KD, Dodson EJ, Emsley P, et al. (2011) Overview of the CCP4 suite and current developments. *Acta Crystallographica Section D, Biological crystallography* 67: 235–242.
- Stein N (2008) CHAINSAW: a program for mutating pdb files used as templates in molecular replacement. *Journal of Applied Crystallography* 41: 641–643.
- McCoy AJ, Grosse-Kunstleve RW, Adams PD, Winn MD, Storoni LC, et al. (2007) Phaser crystallographic software. *J Appl Crystallogr* 40: 658–674.
- Murshudov GN, Skubák P, Lebedev AA, Pannu NS, Steiner RA, et al. (2011) REFMAC5 for the refinement of macromolecular crystal structures. *Acta Crystallographica Section D, Biological crystallography* 67: 355–367.
- Langer G, Cohen SX, Lamzin VS, Perrakis A (2008) Automated macromolecular model building for X-ray crystallography using ARP/wARP version 7. *Nature protocols* 3: 1171–1179.
- Adams PD, Afonine PV, Bunkoczi G, Chen VB, Davis IW, et al. (2010) PHENIX: a comprehensive Python-based system for macromolecular structure solution. *Acta Crystallogr D Biol Crystallogr* 66: 213–221.
- Emsley P, Lohkamp B, Scott WG, Cowtan K (2010) Features and development of Coot. *Acta Crystallogr D Biol Crystallogr* 66: 486–501.
- Krissinel E, Henrick K (2007) Inference of macromolecular assemblies from crystalline state. *J Mol Biol* 372: 774–797.



24. Light SH, Minasov G, Shuvalova L, Duban M-E, Caffrey M, et al. (2011) Insights into the mechanism of type I dehydroquinase dehydratases from structures of reaction intermediates. *The Journal of biological chemistry* 286: 3531–3539.
25. Gourley DG, Shrive AK, Polikarpov I, Krell T, Coggins JR, et al. (1999) The two types of 3-dehydroquinase have distinct structures but catalyze the same overall reaction. *Nature structural biology* 6: 521–525.
26. Light SH, Antanasijevic A, Krishna SN, Caffrey M, Anderson WF, et al. (2014) Crystal structures of type I dehydroquinase dehydratase in complex with quinone and shikimate suggest a novel mechanism of Schiff base formation. *Biochemistry* 53: 872–880.
27. Light SH, Minasov G, Shuvalova L, Peterson SN, Caffrey M, et al. (2011) A conserved surface loop in type I dehydroquinase dehydratases positions an active site arginine and functions in substrate binding. *Biochemistry* 50: 2357–2363.
28. Chaudhuri S, Duncan K, Graham LD, Coggins JR (1991) Identification of the active-site lysine residues of two biosynthetic 3-dehydroquinases. *Biochem J* 275 (Pt 1): 1–6.
29. Noble M, Sinha Y, Kolupaev A, Demin O, Earnshaw D, et al. (2006) The kinetic model of the shikimate pathway as a tool to optimize enzyme assays for high-throughput screening. *Biotechnol Bioeng* 95: 560–573.
30. Segel IH (1975) *Enzyme Kinetics: Behavior and Analysis of Rapid Equilibrium and Steady-State Enzyme Systems*. Wiley. 982 pp. p.
31. Cowan MM (1999) Plant products as antimicrobial agents. *Clin Microbiol Rev* 12: 564–582.
32. Funayama S, Komiyama K, Miyaichi Y, Tomimori T, Nozoe S (1995) Cytocidal and antimicrobial activities of flavonoids. *Nat Med* 49: 322–328.
33. Xu H-X, Lee SF (2001) Activity of plant flavonoids against antibiotic-resistant bacteria. *Phytotherapy Research* 15: 39–43.
34. Kubacey TM, Haggag EG, El-Toumy SA, Ahmed AA, El-Ashmawy IM, et al. (2012) Biological activity and flavonoids from *Centaurea alexanderina* leaf extract.
35. Rauha JP, Remes S, Heinonen M, Hopia A, Kahkonen M, et al. (2000) Antimicrobial effects of Finnish plant extracts containing flavonoids and other phenolic compounds. *Int J Food Microbiol* 56: 3–12.
36. Pereira AP, Ferreira ICFR, Marcelino F, Valentao P, Andrade PB, et al. (2007) Phenolic compounds and antimicrobial activity of olive (*Olea europaea* L. cv. *cobrançosa*) leaves. *Molecules* 12: 1153–1162.
37. Jurd L, King AD Jr, Mihara K (1971) Antimicrobial properties of umbelliferone derivatives. *Phytochemistry* 10: 2965–2970.
38. Kostova IN, Nikolov NM, Chipilska LN (1993) Antimicrobial properties of some hydroxycoumarins and *Fraxinus ornus* bark extracts. *Journal of Ethnopharmacology* 39: 205–208.
39. Venugopala KN, Rashmi V, Odhav B (2013) Review on natural coumarin lead compounds for their pharmacological activity. *BioMed Res Int*: 963248, 963214 pp
40. Hodak K, Jakesova V, Dadak V (1967) On the antibiotic effects of natural coumarins. VI. The relation of structure to the antibacterial effects of some natural coumarins and the neutralization of such effects. *Cesk Farm* 16: 86–91.
41. Ueberschaar N, Xu Z, Scherlach K, Metsä-Ketelä M, Bretschneider T, et al. (2013) Synthetic Remodeling of the Charteusin Pathway to Tune Antiproliferative and Antibacterial Activities. *Journal of the American Chemical Society* 135: 17408–17416.
42. Moreira Osório T, Delle Monache F, Domenechini Chiaradia L, Mascarello A, Regina Stumpf T, et al. (2012) Antibacterial activity of chalcones, hydrazones and oxadiazoles against methicillin-resistant *Staphylococcus aureus*. *Bioorg Med Chem Lett* 22: 225–230.
43. Orlikova B, Schnekenburger M, Zloh M, Golais F, Diederich M, et al. (2012) Natural chalcones as dual inhibitors of HDACs and NF- $\kappa$ B. *Oncol Rep* 28: 797–805.
44. Dias T, Liu B, Jones P, Houghton PJ, Mota-Filipe H, et al. (2012) Cytoprotective effect of *Coreopsis tinctoria* extracts and flavonoids on tBHP and cytokine-induced cell injury in pancreatic MIN6 cells. *J Ethnopharmacol* 139: 485–492.
45. Eumkeb G, Siri Wong S, Phitaktim S, Rojtinakorn N, Sakdarat S (2012) Synergistic activity and mode of action of flavonoids isolated from smaller galangal and amoxicillin combinations against amoxicillin-resistant *Escherichia coli*. *J Appl Microbiol* 112: 55–64.
46. Tran T-D, Do T-H, Tran N-C, Ngo T-D, Huynh T-N-P, et al. (2012) Synthesis and anti-Methicillin resistant *Staphylococcus aureus* activity of substituted chalcones alone and in combination with non-beta-lactam antibiotics. *Bioorg Med Chem Lett* 22: 4555–4560.
